# Supplementary material
Source: PubMed Central journal article supplement (PMC5834716)
Supplement: pnas.201719797SI.pdf [file pnas.201719797SI.pdf]

# Supporting Information

Engl et al. 10.1073/pnas.1719797115

## SI Experimental Procedures

**Insects.** Female specimens of 19 *Philanthus* species and subspecies from North America, Germany, Turkey, and South Africa; five *Trachypus* species from South America; and one *Philanthinus* species from Turkey were collected (Table S4). Adult females were paralyzed by placing them into a freezer for 30 min (if available) and killed by decapitation. Antennae were immediately transferred to ~500  $\mu$ L methanol and kept in methanol until extracts could be processed in the laboratory. If cocoons were available through excavation of beewolf nests (*Philanthus triangulum*, *Philanthus gibbosus*, and *Trachypus elongatus*), they were either frozen or extracted immediately after removal from the brood cells after removal of the larva from the cocoon. For *Philanthinus quattuordecimpunctatus* and all *Philanthus* species from the United States, extracts from different individuals of the same species were pooled before analysis due to low concentrations of secondary metabolites.

**HPLC-ESI-MS/MS Analysis.** The extracts were concentrated to 100  $\mu$ L, and 5  $\mu$ L were subjected to UHPLC-ESI-MS/MS analysis on a Dionex UltiMate 3000 UHPLC (Thermo Fisher Scientific) coupled to an LTQ Orbitrap XL mass spectrometer (Thermo Fisher Scientific) equipped with an ESI source. Substances were separated by reverse-phase chromatography using 0.1% aqueous formic acid (A) and acetonitrile containing 0.1% formic acid (B) at a flow rate of 0.3 mL/min at 50 °C and with UV detection at 230 nm (gradient of solvent B: 0–12 min, hold at 45%; 12–32 min, 45–95%; 32–36 min, hold at 95%; symmetry, 3.5  $\mu$ m C18 phase, 100  $\times$  2.1 mm i.d.; Waters; symmetry guard column, 3.5  $\mu$ m C18, 10  $\times$  2.1 mm i.d.; Waters). Full scan data were acquired at a resolution of 30,000 and a mass range of  $m/z$  100–1,500. MS/MS data were acquired with normalized collision energy of 35.0%. In the data-dependent acquisition mode, the five most abundant ions from the full scan were subjected to fragmentation. Fragmented ions were excluded from additional MS/MS experiments for 30 s to increase the number of fragmented and scanned precursor ions. Raw data files were recalibrated postacquisition with the RecalOffline software (Thermo Fisher Scientific) using the constantly present diisooctylphthalate ( $m/z$  391.28429) as a reference mass.

**Screen for Unique Compounds.** Mass spectra of previously described secondary metabolites from *Streptomyces* bacteria were obtained from Antibase 2005 (1), and the beewolf extracts were screened for corresponding exact masses using the ToxID software (Version 2.1.1; Thermo Fisher Scientific). Additionally, we searched for possible modifications of the known compounds piericidin A1 and streptochlorin. For a more comprehensive screen for piericidin and streptochlorin derivatives, we used Mass Frontier 7.0 and MetWorks1.3 (both Thermo Fisher Scientific) to create candidate parent and fragment masses of piericidin, actinopyrone, and Mer-A2026 modifications and screened all extracts with ToxID again. First, we performed an isotope search of MetWorks 1.3 to screen for chlorine-containing compounds by searching the full scan for the characteristic isotope pattern of one and two chlorine atoms. Second, we used the fragment ion search of Mass Frontier 7.0 to detect derivatives of piericidin A1 based on MS/MS spectra that included the pyridine ring ( $[\text{C}_9\text{H}_{12}\text{NO}_3]^+$ ;  $m/z$  182.08172). In contrast, the fragmentation pattern of all actinopyrones did not include an indicative ring fragment and thus, could not be detected via the MS/MS spectra. Compounds were identified based on MS/MS spectra obtained during data-dependent acquisition and by additional targeted

MS/MS scans. We only performed relative quantification of the reported compounds, as the absolute amount of antibiotics was highly variable and likely depended on the species' size and the filling status of the antennal gland reservoirs upon collection. As external standards were not available for most compounds, we used the peak areas as proxies for the relative amounts of compounds, which may be biased due to different ionization efficiencies. Peak areas of all substances were quantified in Xcalibur software (Version 2.1; Thermo Fisher Scientific) with a mass tolerance of 3 ppm and transformed into relative peak areas.

**Data Analysis.** For visualization of the antibiotic composition across beewolf species, we calculated the decadic logarithm of the relative amount of the mean of each compound in single or pooled extracts of a species. The MultiExperiment Viewer software (2) was used to construct heat maps. As the relative peak areas of a sample are not statistically independent, the dataset was transformed before statistical analysis. We used the centered log ratio transformation according to Aitchison (3), which allows us to include peaks that are absent in some samples (4).

A discriminant analysis (DA) was performed with, in total, 242 extracts (including 220 single and 22 pooled extracts) to investigate whether the antibiotic profiles of the sampled species cluster according to the sampling location. Due to the large number of quantified substances, we reduced the number of variables using a principal component analysis before the DA (varimax rotation; eigenvalues > 1). Both analyses were performed with SPSS 23 (IBM). For the DA, the samples were grouped according to host species and tissue type (antenna or cocoon), and the first two discriminant functions were plotted to observe geographic patterns in the dataset. Additionally, a DA was performed with the samples grouped according to their geographic origin (South America, North America, Europe/Africa).

Procrustes analyses and Mantel and partial Mantel tests as well as Blomberg's  $K$  statistic and PGLS models were applied to assess correlations between the chemical composition of the antibiotic mixture, the host and symbiont phylogenies, and the environmental influence represented by the sampling location. Diversity measures [compound richness, evenness (Shannon's  $E$ ), Shannon's  $H$ , Simpson's  $\lambda$ ] of the chemical composition were calculated from absolute peak areas, and a Euclidean distance matrix was calculated from the centered log ratio-transformed dataset of relative peak areas that was also used for the heat map visualization using SPSS 23. The multigene alignments of the already established cophylogeny (5, 6) were reduced to match the species sampled in this study. For *Trachypus fulvipennis*, partial host gene sequences for arginine kinase, elongation factor 1-alpha, long-wavelength rhodopsin, wingless, cytochrome oxidase I, and 28S rRNA [National Center for Biotechnology Information (NCBI) accession numbers KU759557–KU759562] were obtained as described previously (5). Additionally, partial sequences of the symbiont genes gyrase A, gyrase B, elongation factor G, and Tu (including the intergenic spacer) and 16S rRNA were obtained for the symbionts of *T. fulvipennis*, and elongation factor G and Tu for *T. flavidus* (NCBI accession numbers KU759552–KU759556) (methods are in ref. 5). Phylogenetic trees for hosts and symbionts were reconstructed using approximately maximum likelihood analysis (FastTree 2.1) (7, 8) and Bayesian Inference (MrBayes 3.1.2) based on partitioned alignments (details are in ref. 5). The approximate maximum

likelihood trees used for the comparative displays were visualized with FigTree ([tree.bio.ed.ac.uk/software/figtree/](http://tree.bio.ed.ac.uk/software/figtree/)), and distance matrices for the Mantel tests were computed from the FastTree trees using the T-REX package via the webserver interface (9) ([www.trex.uqam.ca](http://www.trex.uqam.ca)). The geographic distances were calculated from the GPS coordinates of the sample locations using a web-based solution ([www.koordinaten.de](http://www.koordinaten.de)) and log-transformed. The Procrustes analysis and Mantel and partial Mantel tests were computed with the R software (Version 3.0.1) using the packages “permute” and “vegan” (Version 2.0–8), respectively. Spearman rank correlations were used, as not all datasets were normally distributed. The dendrograms based on the geographic and chemical distance matrices were calculated in PHYLIP (10) using the neighbor-joining algorithm.

To test for a phylogenetic signal of both the host and symbiont phylogeny on the composition of the antibiotic mixtures, we calculated Blomberg's  $K$  (11–13) for the different diversity measures and tested against a random change ( $P_R$ ) as well as against expected evolutionary changes under a Brownian motion model ( $P_{BM}$ ). A Blomberg's  $K$  value of one indicates that investigated traits in related taxa resemble each other according to a Brownian motion model of trait evolution, a value higher than one means that taxa resemble each other more than under this model, values lower than one indicate that they resemble each other less, and a value of zero indicates random change of the trait (no phylogenetic signal). Blomberg's  $K$  and  $P_R$  were calculated using R studio Version 1.0.143 and the command `phylosig` in the package “phytools,” with 10,000 randomizations. A Brownian motion model of trait evolution was established, and  $P_{BM}$  calculated using the commands `brownie.lite` and `fastBM` in the package “phytools,” with 10,000 randomizations.

Finally, we tested for an influence of geography by computing PGLS (14, 15) using the log-transformed Universal Transverse Mercator coordinates of sampling locations as input variables and correcting for host and symbiont phylogeny. PGLS using either a Brownian motion model or an Ornstein–Uhlenbeck model of trait evolution (16) was computed using the command `gls` of the R package “nlme.” We used Akaike's Information Criterion to select the better fitting model of evolution. The significant values of diversity indices tested for phylogenetic and geographic influences were corrected for multiple testing using the Bonferroni procedure of Benjamini and Hochberg (17).

**Sequencing of the PKS Gene Cluster.** Total DNA was extracted from *Streptomyces philanthi* biovar *triangulum* strain tri23Af2 grown in Grace's medium as described before (6). Briefly, bacteria were lysed in a Tris-EDTA-sucrose buffer (25 mM Tris, pH 8.0, 25 mM EDTA, pH 8.0, 0.3 M sucrose) with lysozyme (2 mg/mL), proteinase K (20 mg/mL), and SDS (0.6%); proteins were precipitated from the lysate using Protein Precipitation Solution (Qiagen) followed by centrifugation at  $>16,000 \times g$  for 10 min at 4 °C. Nucleic acids were precipitated with an equal volume of isopropanol followed by centrifugation at  $\geq 16,000 \times g$  for 10 min. The pellet was then washed twice with EtOH (70%), air-dried, and resuspended in elution buffer; later, the extracted nucleic acid solution was treated with RNase A (Epicentre), and the DNA was precipitated using isopropanol as described above.

Genomic DNA from *S. philanthi* biovar *triangulum* was sequenced using 454 technology from shotgun (LGC Genomics)

and 8-kb paired end libraries (Eurofins MWG Operon). De novo genome assembly was performed using Newbler software package v 2.7 (454 Life Sciences; Roche) that resulted in one scaffold of 261 contigs and 2 unassembled contigs. Gene prediction was done using the software GeneMark.hmm ([exon.gatech.edu/GeneMark/gmhmm.cgi](http://exon.gatech.edu/GeneMark/gmhmm.cgi)); predicted genes were annotated using Blast2go 2.8 (18). The piericidin biosynthesis gene cluster (NCBI accession number KX098584) was identified by analyzing possible products from revealed PKS gene clusters using NP.searcher ([dna.sherman.lsi.umich.edu/](http://dna.sherman.lsi.umich.edu/)). Later, prediction was verified using the SEARCHPKS program (19, 20) and the piericidin gene cluster from *Streptomyces piomogenus* (21). The substrate specificity of the AT domains was assessed with the NRPS-PKS tool of the “Structure Based Sequence Analysis of Polyketide Synthases” program (22, 23).

**Antibiotic Interaction Assays.** To assess synergistic and antagonistic interactions among the beewolf symbiont-produced antibiotics, we tested the bioactivity of combinations of the three major components of the antibiotic mixture in agar diffusion assays focusing on differential activities of the combination of two vs. single antibiotic and three vs. two. Piericidin A1 was purchased from Enzo LifeSciences, piericidin B1 was synthesized from piericidin A1 following the protocol by Schnermann et al. (24), and streptochlorin was synthesized de novo as described previously (25). For the inhibition assays, we chose *Aspergillus oryzae* (DSM1147) as a filamentous mold fungus and the yeasts *Candida guilliermondii* (*Meyerozyma guilliermondii* DSM6381) and *Yarrowia lipolytica* (DSM1345). Piericidin A1 and B1 and streptochlorin were all dissolved in methanol. In a preliminary test series, we established working concentrations of all three antibiotics and controlled for any effects of the pure solvent. In our final tests, we tested 1  $\mu$ g of piericidin A1, 1  $\mu$ g of piericidin B1, 20  $\mu$ g of streptochlorin, and additive mixtures of all possible combinations of two or three of the compounds (e.g., 1  $\mu$ g piericidin A1 plus 20  $\mu$ g streptochlorin) in eight replicates. The test organisms were pregrown in liquid culture and streaked on potato-dextrose agar using cotton swabs. After drying the plates, holes with 5-mm diameters were punched in the agar and filled with 20  $\mu$ L methanol containing the different antibiotic mixtures. After 24 h of incubation at 30 °C, we measured inhibition zones to the closest millimeter for the yeasts and after 48 h at 30 °C for *A. oryzae*. Measurement was done blind (i.e., the person measuring the zones was unaware of each field's treatment). Square root-transformed inhibition zones were compared in a one-way ANOVA with Tukey post hoc tests. Data were tested for normal distribution and variance homogeneity with the Shapiro–Wilk test and Levene test, respectively. As all except the square root-transformed piericidin B1 *Y. lipolytica* inhibition zones were normally distributed, we used a one-way ANOVA, performing the *Y. lipolytica* test with and without the piericidin B1 group to compare global test results, and complemented the global and two “missing” post hoc tests involving the piericidin B1 group with nonparametric Kruskal–Wallis and Mann–Whitney  $U$  tests and subsequent correction for multiple testing following the Bonferroni correction by Benjamini and Hochberg (17). All tests were performed with SPSS 23.

- Laatsch H (2005) *Antibase* (Wiley VCH, Weinheim, Germany).
- Saeed AI, et al. (2003) TM4: A free, open-source system for microarray data management and analysis. *Biotechniques* 34:374–378.
- Aitchison J (1986) *The Statistical Analysis of Compositional Data* (Chapman Hall, London).
- Bruckner A, Heethoff M (2017) A chemo-ecologists' practical guide to compositional data analysis. *Chemoecology* 27:33–46.
- Kaltenpoth M, et al. (2014) Partner choice and fidelity stabilize coevolution in a Cretaceous-age defensive symbiosis. *Proc Natl Acad Sci USA* 111:6359–6364.

- Nechitaylo TY, Westermann M, Kaltenpoth M (2014) Cultivation reveals physiological diversity among defensive *Streptomyces philanthi* symbionts of beewolf digger wasps (Hymenoptera, Crabronidae). *BMC Microbiol* 14:202.
- Price MN, Dehal PS, Arkin AP (2009) FastTree: Computing large minimum evolution trees with profiles instead of a distance matrix. *Mol Biol Evol* 26:1641–1650.
- Price MN, Dehal PS, Arkin AP (2010) FastTree 2—Approximately maximum-likelihood trees for large alignments. *PLoS One* 5:e9490.
- Boc A, Diallo AB, Makarenkov V (2012) T-REX: A web server for inferring, validating and visualizing phylogenetic trees and networks. *Nucleic Acids Res* 40:W573–W579.

10. Felsenstein J (1989) PHYLIP: Phylogeny inference package (Version 3.2). *Cladistics* 5: 164–166.
11. Blomberg SP, Garland T, Jr, Ives AR (2003) Testing for phylogenetic signal in comparative data: Behavioral traits are more labile. *Evolution* 57:717–745.
12. Pavoine S, Ricotta C (2013) Testing for phylogenetic signal in biological traits: The ubiquity of cross-product statistics. *Evolution* 67:828–840.
13. Menzel F, Schmitt T, Blaimer BB (2017) The evolution of a complex trait: Cuticular hydrocarbons in ants evolve independent from phylogenetic constraints. *J Evol Biol* 30:1372–1385.
14. Symonds MRE, Blomberg SP (2014) A primer on phylogenetic generalised least squares. *Modern Phylogenetic Comparative Methods and Their Application in Evolutionary Biology: Concepts and Practice*, ed Garamszegi LZ (Springer, Berlin), pp 105–130.
15. Mundry R (2014) Statistical issues and assumptions of phylogenetic generalized least squares. *Modern Phylogenetic Comparative Methods and Their Application in Evolutionary Biology: Concepts and Practice*, ed Garamszegi LZ (Springer, Berlin), pp 131–153.
16. O'Meara BC, Beaulieu JM (2014) Modelling stabilizing selection: The attraction of Ornstein–Uhlenbeck models. *Modern Phylogenetic Comparative Methods and Their Application in Evolutionary Biology: Concepts and Practice*, ed Garamszegi LZ (Springer, Berlin), pp 381–393.
17. Benjamini Y, Hochberg Y (1995) Controlling the false discovery rate: A practical and powerful approach to multiple testing. *J R Stat Soc Series B Stat Methodol* 57: 289–300.
18. Conesa A, et al. (2005) Blast2GO: A universal tool for annotation, visualization and analysis in functional genomics research. *Bioinformatics* 21:3674–3676.
19. Yadav G, Gokhale RS, Mohanty D (2003) Computational approach for prediction of domain organization and substrate specificity of modular polyketide synthases. *J Mol Biol* 328:335–363.
20. Yadav G, Gokhale RS, Mohanty D (2003) SEARCHPKS: A program for detection and analysis of polyketide synthase domains. *Nucleic Acids Res* 31:3654–3658.
21. Liu Q, et al. (2012) Elucidation of Piericidin A1 biosynthetic locus revealed a thioesterase-dependent mechanism of  $\alpha$ -pyridone ring formation. *Chem Biol* 19:243–253.
22. Ansari MZ, Yadav G, Gokhale RS, Mohanty D (2004) NRPS-PKS: A knowledge-based resource for analysis of NRPS/PKS megasynthases. *Nucleic Acids Res* 32:W405–W413.
23. Anand S, et al. (2010) SBSPKS: Structure based sequence analysis of polyketide synthases. *Nucleic Acids Res* 38:W487–W496.
24. Schnermann MJ, et al. (2006) Total synthesis of piericidin A1 and B1 and key analogues. *J Am Chem Soc* 128:11799–11807.
25. Koehler S, Doubský J, Kaltenpoth M (2013) Dynamics of symbiont-mediated antibiotic production reveal efficient long-term protection for beewolf offspring. *Front Zool* 10:3.

**Table S1. Secondary metabolites with demonstrated or putative antibiotic activity identified in the antennal and cocoon extracts of beewolf digger wasps (Hymenoptera, Crabronidae: Philanthini)**

| No.                               | Compound                                           | Formula [M]       | Molecular mass [u] | Substance verification | Bioactivity         | Ref(s).        |
|-----------------------------------|----------------------------------------------------|-------------------|--------------------|------------------------|---------------------|----------------|
| <b>Streptochlorin derivatives</b> |                                                    |                   |                    |                        |                     |                |
| 1                                 | <b>Streptochlorin (SF2583A)</b>                    | <b>C11H7ClN2O</b> | <b>218.02469</b>   | <b>N, S, IF</b>        | <b>AB, AF</b>       | 1              |
| 2                                 | Pimprinine (SF2583B)                               | C11H8N2O          | 184.06366          | IF                     | AB, AF              | 1              |
| 3                                 | Pentenyl-Streptochlorin                            | C16H15ClN2O       | 286.08729          | IF                     |                     | —              |
| <b>Piericidin derivatives</b>     |                                                    |                   |                    |                        |                     |                |
| 4                                 | <b>Piericidin A1</b>                               | <b>C25H37NO4</b>  | <b>415.27226</b>   | <b>N, S, IF</b>        | <b>AB, AF</b>       | 2,3            |
| 5                                 | <b>Piericidin B1</b>                               | <b>C26H39NO4</b>  | <b>429.28791</b>   | <b>N, S, IF</b>        | <b>AB, AF</b>       | 4              |
| 6                                 | <b>Piericidin A5</b>                               | <b>C26H39NO4</b>  | <b>429.28794</b>   | <b>IF</b>              |                     | 5              |
| 7                                 | <b>Piericidin B5</b>                               | <b>C27H41NO4</b>  | <b>443.30359</b>   | <b>IF</b>              | <b>no AB, no AF</b> | 6              |
| 8                                 | 12-Propyl-Piericidin (Piericidin A3)               | C27H41NO4         | 443.30356          | IF                     |                     | 7              |
| 9                                 | <b>IT143B</b>                                      | <b>C28H41NO4</b>  | <b>455.30356</b>   | <b>IF</b>              | <b>AB, AF</b>       | 8              |
| 10                                | <b>Piericidin C1a</b>                              | <b>C25H37NO5</b>  | <b>431.26717</b>   | <b>IF</b>              |                     | 7              |
| 11                                | Piericidin C1b                                     | C25H37NO5         | 431.26717          | IF                     |                     | —              |
| 12                                | Dehydro-Piericidin A1a                             | C25H35NO4         | 413.25661          | IF                     |                     | —              |
| 13                                | Dehydro-Piericidin A1b                             | C25H35NO4         | 413.25661          | IF                     |                     | —              |
| 14                                | Dehydro-Piericidin A1c                             | C25H35NO4         | 413.25661          | IF                     |                     | —              |
| 15                                | Dehydro-Piericidin A1d                             | C25H35NO4         | 413.25661          | IF                     |                     | —              |
| 16                                | Dehydro-Piericidin A1e                             | C27H39NO4         | 441.28791          | IF                     |                     | —              |
| 17                                | Dehydro-Piericidin B1a                             | C26H37NO4         | 427.27226          | IF                     |                     | —              |
| 18                                | Dehydro-Piericidin B1b                             | C26H37NO4         | 427.27226          | IF                     |                     | —              |
| 19                                | 11-Dihydro-12-Propyl-Piericidin                    | C27H43NO4         | 445.31921          | IF                     |                     | —              |
| 20                                | 11-Dihydro-12-Butyl-Piericidin                     | C28H45NO4         | 459.33486          | IF                     |                     | —              |
| 21                                | 11-Dihydro-12-Pentyl-Piericidin                    | C29H47NO4         | 473.35051          | IF                     |                     | —              |
| 22                                | 3-deMe-Piericidin A1                               | C24H35NO4         | 401.25664          | IF                     |                     | —              |
| 23                                | 7-deMe-Piericidin A1                               | C24H35NO4         | 401.25661          | IF                     | AB, AF              | 9              |
| 24                                | <b>9-deMe-Piericidin A1</b>                        | <b>C24H35NO4</b>  | <b>401.25661</b>   | <b>IF</b>              |                     | 5              |
| 25                                | 11-deMe-Piericidin A1                              | C24H35NO4         | 401.25661          | IF                     | AB                  | 10             |
| 26                                | Hydroxy-Piericidin C1                              | C26H37NO6         | 459.26209          | IF                     |                     | —              |
| 27                                | Nitro-Piericidin C1                                | C25H38N2O7        | 478.26790          | IF                     |                     | —              |
| 28                                | <b>Glucopiericidin A1a</b>                         | <b>C31H47NO9</b>  | <b>577.32508</b>   | <b>IF</b>              | <b>AB, AF</b>       | 5,11           |
| 29                                | Glucopiericidin A1b                                | C31H47NO9         | 577.32508          | IF                     | AB, AF              | 11             |
| 30                                | Glucopiericidin A5a                                | C32H49O9N         | 591.34073          | IF                     | AB                  | 10             |
| 31                                | Glucopiericidin A5b                                | C32H49O9N         | 591.34073          | IF                     |                     | —              |
| 32                                | <i>N</i> -Acetyl-Glucosamine-Piericidin A1         | C33H50N2O9        | 618.35163          | IF                     |                     | —              |
| 33                                | Glucophospho-Piericidin A1                         | C31H48NO12P       | 657.29142          | IF                     |                     | —              |
| 34                                | Phospho-Piericidin A1                              | C25H38NO7P        | 495.23859          | IF                     |                     | —              |
| 35                                | AnhydroGlucophospho-Piericidin A1                  | C31H46NO11P       | 6392.8085          | IF                     |                     | —              |
| 36                                | 5,6-Dimethoxy-3-methyl-2-hydroxymethylpyridin-4-ol | C9H13NO4          | 199.08446          | IF                     |                     | 12             |
| 37                                | 5,6-Dimethoxy-3-methyl-2-hydroxypropylpyridin-4-ol | C11H17NO4         | 227.11576          | IF                     |                     | —              |
| 38                                | 306.16998 @ 18.55 min                              | C17H23NO4         | 305.16271          | F                      |                     | —              |
| 39                                | 334.1650 @ 10.0 min                                | C18H23NO5         | 333.15762          | F                      |                     | —              |
| 40                                | 348.21689 @ 20.8 min                               | C20H29NO4         | 347.20966          | F                      |                     | —              |
| <b>Mer-A2026 derivatives</b>      |                                                    |                   |                    |                        |                     |                |
| 41                                | Mer-A2026-0                                        | C23H33NO3         | 371.24604          | IF                     |                     |                |
| 42                                | 10-MeO-Mer-A2026-0                                 | C24H35NO3         | 385.26169          | IF                     |                     | 13 for Mer-    |
| 43                                | 10-MeO-Mer-A2026-B                                 | C25H37O3N         | 399.27734          | IF                     |                     | A2026-A and -B |
| 44                                | x-Me-Mer-A2026-B                                   | C25H37O3N         | 399.27734          | IF                     |                     | —              |
| 45                                | x-Me-10MeO-Mer-A2026-B                             | C26H39NO3         | 413.29299          | IF                     |                     | —              |
| <b>Actinopyrone derivatives</b>   |                                                    |                   |                    |                        |                     |                |
| 46                                | Actinopyrone A                                     | C25H36O4          | 400.26136          | S, F                   | AB                  | 14             |
| 47                                | 10-MeO-Actinopyrone A                              | C26H38O4          | 414.27701          | F                      |                     | —              |
| 48                                | 10-MeO-Actinopyrone B                              | C25H36O4          | 400.26136          | F                      |                     | —              |

Table S1. Cont.

| No.                   | Compound  | Formula [M] | Molecular mass [u] | Substance verification | Bioactivity | Ref(s). |
|-----------------------|-----------|-------------|--------------------|------------------------|-------------|---------|
| Nigericin derivatives |           |             |                    |                        |             |         |
| 49                    | Nigericin | C40H68O11   | 724.47616          | S                      | AB (AF)     | 15      |

Compounds described previously from cocoons of the European beewolf (*P. triangulum*) (5) are highlighted in bold. Methods used to verify substance identities and structures are indicated by abbreviations (N, NMR; S, synthetic standard; IF, highly informative fragmentation patterns; F, simple fragmentation patterns) (Fig. S1). Known bioactivities are included as antibacterial (AB) and antifungal (AF), and all previously described compounds are referenced.

- Watabe H-o, et al. (1988) A new antibiotic SF 2583 A, 4-chloro-5-(3'-indolyl)oxazole, produced by *Streptomyces*. *Sci Rep Meiji Seika Kaisha* 27:55–62.
- Tamura S, et al. (1963) Isolation and physiological activities of piericidin A, a natural insecticide produced by *Streptomyces*. *Agric Biol Chem* 27:576–582.
- Takahashi N, Suzuki A, Tamura S (1965) Structure of piericidin A. *J Am Chem Soc* 87:2066–2068.
- Takahashi N, et al. (1968) Isolation, structure and physiological activities of piericidin B, natural insecticide produced by a *Streptomyces*. *Agric Biol Chem* 32:1115–1122.
- Kroiss J, et al. (2010) Symbiotic streptomycetes provide antibiotic combination prophylaxis for wasp offspring. *Nat Chem Biol* 6:261–263.
- Nishioka H, et al. (1993) Isolation and structure determination of novel phosphatidylinositol turnover inhibitors, piericidin B5 and B5 N-oxide, from *Streptomyces* sp. *J Antibiot (Tokyo)* 46:564–568.
- Yoshida S, Yoneyama K, Shiraishi S, Watanabe A, Takahashi N (1977) Chemical structures of new piericidins produced by *Streptomyces pactum*. *Agric Biol Chem* 41:855–862.
- Urakawa A, et al. (1996) IT-143-A and B, novel piericidin-group antibiotics produced by *Streptomyces* sp. *J Antibiot (Tokyo)* 49:1052–1055.
- Kimura K, Takahashi H, Miyata N, Yoshihama M, Uramoto M (1996) New piericidin antibiotics, 7-demethylpiericidin A1 and 7-demethyl-3'-rhamnopericidin A1. *J Antibiot (Tokyo)* 49:697–699.
- Kyowa Hakkō Kogyō CO LTD (1998) Japan Patent Office JP.10-330363.A.
- Matsumoto M, et al. (1987) New piericidin glucosides, gluco-piericidin-A and gluco-piericidin-B. *J Antibiot (Tokyo)* 40:149–156.
- Schnermann MJ, et al. (2006) Total synthesis of piericidin A1 and B1 and key analogues. *J Am Chem Soc* 128:11799–11807.
- Kominato K, et al. (1995) Mer-A2026A and B, novel piericidins with vasodilating effect. I. Producing organism, fermentation, isolation and biological properties. *J Antibiot (Tokyo)* 48:99–102.
- Yano K, et al. (1986) Actinopyrone-A, actinopyrone-B and actinopyrone-C new physiologically active substances. 1. Producing organism, fermentation, isolation and biological properties. *J Antibiot (Tokyo)* 39:32–37.
- Fang A, Wong GK, Demain AL (2000) Enhancement of the antifungal activity of rapamycin by the coproduced elaiophyllin and nigericin. *J Antibiot (Tokyo)* 53:158–162.

**Table S2. Detailed statistical results for tests of phylogenetic influence on richness, evenness, and diversity of secondary metabolites in beewolf cocoon extracts, using phylogenetically independent contrasts (PICs) as well as phylogenetic generalized least squares models (PGLS)**

| Output variables                 | Richness              | Evenness          | Shannon's <i>H</i>  | Simpson's $\lambda$ |
|----------------------------------|-----------------------|-------------------|---------------------|---------------------|
| Corrected for symbiont phylogeny |                       |                   |                     |                     |
| PICs                             |                       |                   |                     |                     |
| <i>F</i>                         | 2.9                   | 17.4              | 7.3                 | 10.3                |
| <i>p</i>                         | 0.05995               | 0.0001            | 0.0018              | 0.0003              |
| df                               |                       | 3 and 20          |                     |                     |
| Intercept                        |                       |                   |                     |                     |
| Estimate $\pm$ SE                | -38.2 $\pm$ 46.4      | -0.02 $\pm$ 0.8   | -0.6 $\pm$ 2.2      | 0.3 $\pm$ 0.8       |
| <i>t</i>                         | -0.825                | -0.024            | -0.273              | 0.313               |
| <i>p</i>                         | 0.04194               | 0.9809            | 0.776               | 0.7572              |
| Log_easting                      |                       |                   |                     |                     |
| Estimate $\pm$ SE                | -37.3 $\pm$ 16.1      | 0.5 $\pm$ 0.2     | 0.4 $\pm$ 0.8       | -0.4 $\pm$ 0.3      |
| <i>t</i>                         | -2.315                | 1.992             | 0.476               | -1.35               |
| <i>p</i>                         | 0.0314                | 0.0602            | 0.6393              | 0.1920              |
| Log_northing                     |                       |                   |                     |                     |
| Estimate $\pm$ SE                | 27.5 $\pm$ 53.2       | -0.1 $\pm$ 0.8    | 1.9 $\pm$ 2.6       | -0.8 $\pm$ 1.0      |
| <i>t</i>                         | 0.518                 | -0.162            | 0.735               | -0.838              |
| <i>p</i>                         | 0.6105                | 0.8728            | 0.471               | 0.4121              |
| Interaction                      |                       |                   |                     |                     |
| Estimate $\pm$ SE                | -9.3 $\pm$ 11.1       | -0.6 $\pm$ 0.2    | -1.8 $\pm$ 0.5      | 0.7 $\pm$ 0.2       |
| <i>t</i>                         | -0.841                | -3.729            | -3.394              | 3.41                |
| <i>p</i>                         | 0.4102                | 0.0013            | 0.0029              | 0.0028              |
| PGLS—Brownian motion model       |                       |                   |                     |                     |
| AIC                              | 181.4                 | -10.3             | 39.2                | -4.1                |
| Intercept                        |                       |                   |                     |                     |
| Estimate $\pm$ SE                | 3,294.6 $\pm$ 3,158.0 | -22.7 $\pm$ 68.3  | -506.2 $\pm$ 184.0  | 235.8 $\pm$ 77.3    |
| <i>t</i>                         | 104.2200              | -3.2888           | -2.7513             | 3.0510              |
| <i>p</i>                         | 0.3092                | 0.0035            | 0.0120              | 0.0061              |
| Log_easting                      |                       |                   |                     |                     |
| Estimate $\pm$ SE                | -616.1 $\pm$ 561.6    | 40.4 $\pm$ 12.1   | 89.8 $\pm$ 32.7     | -41.5 $\pm$ 13.7    |
| <i>t</i>                         | -1.0972               | 3.3253            | 2.7446              | -3.0184             |
| <i>p</i>                         | 0.2850                | 0.0032            | 0.0121              | 0.0065              |
| Log_northing                     |                       |                   |                     |                     |
| Estimate $\pm$ SE                | 472.1 $\pm$ 466.9     | 32.9 $\pm$ 10.1   | 74.3 $\pm$ 27.2     | -34.3 $\pm$ 11.4    |
| <i>t</i>                         | -1.0112               | 3.2532            | 2.7314              | -3.0054             |
| <i>p</i>                         | 0.3234                | 0.0038            | 0.0125              | 0.0067              |
| Interaction                      |                       |                   |                     |                     |
| Estimate $\pm$ SE                | 89.0 $\pm$ 83.0       | -5.9 $\pm$ 1.8    | 13.1 $\pm$ 4.8      | 6.1 $\pm$ 2.0       |
| <i>t</i>                         | 1.0725                | -3.2837           | -2.7185             | 2.9784              |
| <i>p</i>                         | 0.2957                | 0.0035            | 0.0129              | 0.0072              |
| PGLS—Ornstein–Uhlenbeck model    |                       |                   |                     |                     |
| AIC                              | 180.3                 | -25.7             | Model not converged |                     |
| Alpha                            | 35.3                  | 516.8             | 6655.2              |                     |
| Intercept                        |                       |                   |                     |                     |
| Estimate $\pm$ SE                | 3,599.5 $\pm$ 3,078.5 | -179.5 $\pm$ 58.0 | 135.0 $\pm$ 64.4    |                     |
| <i>t</i>                         | 1.1692                | -3.0957           | 2.0968              |                     |
| <i>p</i>                         | 0.2554                | 0.0055            | 0.0483              |                     |
| Log_easting                      |                       |                   |                     |                     |
| Estimate $\pm$ SE                | -668.9 $\pm$ 546.5    | 32.7 $\pm$ 10.4   | -23.9 $\pm$ 11.5    |                     |
| <i>t</i>                         | -1.2240               | 3.1560            | -2.081              |                     |
| <i>p</i>                         | 0.2345                | 0.0048            | 0.0499              |                     |
| Log_northing                     |                       |                   |                     |                     |
| Estimate $\pm$ SE                | -517.5 $\pm$ 455.8    | 26.3 $\pm$ 8.5    | -19.7 $\pm$ 9.5     |                     |
| <i>t</i>                         | -1.1350               | 3.0710            | -2.073              |                     |
| <i>p</i>                         | 0.2691                | 0.0058            | 0.0506              |                     |
| Interaction                      |                       |                   |                     |                     |
| Estimate $\pm$ SE                | 96.9 $\pm$ 80.9       | -4.8 $\pm$ 1.5    | 3.5 $\pm$ 1.7       |                     |
| <i>t</i>                         | 1.1970                | -3.1240           | 2.064               |                     |
| <i>p</i>                         | 0.2446                | 0.0051            | 0.0515              |                     |
| Corrected for host phylogeny     |                       |                   |                     |                     |
| <i>F</i>                         | 2                     | 3.2               | 1.8                 | 4.8                 |
| <i>p</i>                         | 0.146                 | 0.046             | 0.1752              | 0.0109              |

Table S2. Cont.

| Output variables              | Richness              | Evenness          | Shannon's <i>H</i> | Simpson's $\lambda$ |
|-------------------------------|-----------------------|-------------------|--------------------|---------------------|
| df                            |                       | 3 and 20          |                    |                     |
| Intercept                     |                       |                   |                    |                     |
| Estimate $\pm$ SE             | $-26.0 \pm 12.3$      | $0.08 \pm 0.2$    | $-0.5 \pm 0.4$     | $0.01 \pm 0.2$      |
| <i>t</i>                      | -2.085                | 0.494             | -1.066             | 0.058               |
| <i>p</i>                      | 0.0501                | 0.6265            | 0.299              | 0.9546              |
| Log_easting                   |                       |                   |                    |                     |
| Estimate $\pm$ SE             | $-23.9 \pm 12.3$      | $0.4 \pm 0.2$     | $0.4 \pm 0.4$      | $-0.4 \pm 0.2$      |
| <i>t</i>                      | -1.95                 | 2.226             | 0.901              | -2.271              |
| <i>p</i>                      | 0.0654                | 0.0377            | 0.378              | 0.0343              |
| Log_northing                  |                       |                   |                    |                     |
| Estimate $\pm$ SE             | $-13.5 \pm 36.0$      | $-0.7 \pm 0.5$    | $-0.8 \pm 1.3$     | $0.08 \pm 0.5$      |
| <i>t</i>                      | -0.375                | -1.403            | -0.648             | 0.155               |
| <i>p</i>                      | 0.7119                | 0.176             | 0.524              | 0.878               |
| Interaction                   |                       |                   |                    |                     |
| Estimate $\pm$ SE             | $30.0 \pm 19.6$       | $0.3 \pm 0.3$     | $1.0 \pm 0.7$      | $-0.4 \pm 0.3$      |
| <i>t</i>                      | 1.53                  | 1.138             | 1.527              | -1.545              |
| <i>p</i>                      | 0.1417                | 0.2686            | 0.142              | 0.138               |
| PGLS—Brownian motion model    |                       |                   |                    |                     |
| AIC                           | 196.7                 | -15.6             | 29.7               | -10.3               |
| Intercept                     |                       |                   |                    |                     |
| Estimate $\pm$ SE             | $-2,417.6 \pm 4846.5$ | $-121.1 \pm 69.3$ | $-270.0 \pm 171.6$ | $111.8 \pm 77.2$    |
| <i>t</i>                      | -0.4988               | -1.7462           | -1.5738            | 1.4480              |
| <i>p</i>                      | 0.6231                | 0.0954            | 0.1305             | 0.1623              |
| Log_easting                   |                       |                   |                    |                     |
| Estimate $\pm$ SE             | $388.0 \pm 858.8$     | $22.6 \pm 12.3$   | $49.1 \pm 30.4$    | $-19.8 \pm 19.7$    |
| <i>t</i>                      | 0.4519                | 1.8368            | 1.6138             | -1.4485             |
| <i>p</i>                      | 0.6560                | 0.0804            | 0.1215             | 0.1623              |
| Log_northing                  |                       |                   |                    |                     |
| Estimate $\pm$ SE             | $385.7 \pm 717.1$     | $17.6 \pm 10.3$   | $39.8 \pm 25.4$    | $-16.1 \pm 11.4$    |
| <i>t</i>                      | 0.5378                | 1.7153            | 1.5685             | -1.4119             |
| <i>p</i>                      | 0.5964                | 0.101             | 0.1317             | 0.1726              |
| Interaction                   |                       |                   |                    |                     |
| Estimate $\pm$ SE             | $-61.8 \pm 127.1$     | $-3.3 \pm 1.8$    | $-7.2 \pm 4.5$     | $2.9 \pm 2.0$       |
| <i>t</i>                      | -0.4865               | -1.8000           | -1.6018            | 1.4174              |
| <i>p</i>                      | 0.6317                | 0.0862            | 0.1241             | 0.1710              |
| PGLS—Ornstein–Uhlenbeck model |                       |                   |                    |                     |
| AIC                           | 194.6                 | -24.6             | 22                 | -20.5               |
| Alpha                         | 41.8                  | 259.4             | 119.3              | 235.3               |
| Intercept                     |                       |                   |                    |                     |
| Estimate $\pm$ SE             | $984.1 \pm 4653.9$    | $-174.2 \pm 59.2$ | $-289.5 \pm 148.9$ | $134.7 \pm 64.1$    |
| <i>t</i>                      | 0.2115                | -2.9440           | -1.9441            | 2.0947              |
| <i>p</i>                      | 0.8346                | 0.0077            | 0.0654             | 0.0485              |
| Log_easting                   |                       |                   |                    |                     |
| Estimate $\pm$ SE             | $-222.3 \pm 831.4$    | $31.9 \pm 10.5$   | $51.7 \pm 26.6$    | $-23.7 \pm 11.4$    |
| <i>t</i>                      | -0.267                | 3.024             | 1.948              | -2.077              |
| <i>p</i>                      | 0.792                 | 0.0065            | 0.0649             | 0.0503              |
| Log_northing                  |                       |                   |                    |                     |
| Estimate $\pm$ SE             | $-122.3 \pm 687.4$    | $25.5 \pm 8.7$    | $42.7 \pm 21.9$    | $-19.6 \pm 9.4$     |
| <i>t</i>                      | -0.178                | 2.924             | 1.947              | -2.071              |
| <i>p</i>                      | 0.861                 | 0.0081            | 0.065              | 0.0509              |
| Interaction                   |                       |                   |                    |                     |
| Estimate $\pm$ SE             | $29.2 \pm 122.8$      | $-4.7 \pm 1.6$    | $-7.6 \pm 3.9$     | $3.5 \pm 1.7$       |
| <i>t</i>                      | 0.238                 | -2.997            | 1.944              | 2.06                |
| <i>p</i>                      | 0.814                 | 0.0069            | 0.0655             | 0.052               |

AIC, Akaike's Information Criterion.

**Table S3. Substrate specificity of the piericidin PKS elongating AT domains**

| Organism                                         | Polyketide module            | Q                                     | Q | G | H | S | Q | G | R | S | H | N | N | V | Specificity              | Detected incorporation |
|--------------------------------------------------|------------------------------|---------------------------------------|---|---|---|---|---|---|---|---|---|---|---|---|--------------------------|------------------------|
|                                                  |                              | Substrate-specifying amino acid motif |   |   |   |   |   |   |   |   |   |   |   |   |                          |                        |
| <i>S. phillanthi</i> biovar <i>triangulum</i>    | PiericidinA1_AT_002.seq      | Q                                     | Q | G | H | S | Q | G | R | S | H | N | N | V | Methylmalonate/malonate  | 99.7% mmal             |
| <i>S. phillanthi</i> biovar <i>triangulum</i>    | PiericidinA2_AT_001.seq      | Q                                     | Q | G | H | S | Q | G | R | S | H | N | N | V | Methylmalonate/malonate  | 99.2% mmal             |
| <i>S. phillanthi</i> biovar <i>triangulum</i>    | PiericidinA2_AT_002.seq      | Q                                     | Q | G | H | S | Q | G | R | S | H | N | N | V | Methylmalonate/malonate  | 99.9% mmal             |
| <i>S. phillanthi</i> biovar <i>triangulum</i>    | PiericidinA4_AT_001.seq      | Q                                     | Q | G | H | S | Q | G | R | S | H | N | N | V | Methylmalonate/malonate  | 99.1% mmal             |
| <i>S. phillanthi</i> biovar <i>triangulum</i>    | PiericidinA6_AT_001.seq      | Q                                     | Q | G | H | S | Q | G | R | S | H | N | N | V | Methylmalonate/malonate? | N.d.                   |
| <i>S. phillanthi</i> biovar <i>triangulum</i>    | PiericidinA3_AT_001.seq      | Q                                     | R | G | V | G | ~ | ~ | ~ | ~ | ~ | ~ | ~ | ~ | Malonate                 | 100% mal               |
| <i>S. phillanthi</i> biovar <i>triangulum</i>    | PiericidinA5_AT_001.seq      | Q                                     | Q | G | H | S | V | G | R | F | H | N | H | V | Malonate                 | N.d.                   |
| <i>S. phillanthi</i> biovar <i>triangulum</i>    | PiericidinA6_AT_002.seq      | Q                                     | Q | G | H | D | V | G | R | F | H | N | H | V | Malonate                 | N.d.                   |
| <i>S. piomogenus</i> var <i>hangzhouwanensis</i> | PiericidinA1_AT_002.seq      | Q                                     | Q | G | H | S | Q | G | R | D | H | T | N | V | Methylmalonate           |                        |
| <i>S. piomogenus</i> var <i>hangzhouwanensis</i> | PiericidinA2_AT_001.seq      | Q                                     | Q | G | H | S | Q | G | R | S | H | T | N | V | Methylmalonate           |                        |
| <i>S. piomogenus</i> var <i>hangzhouwanensis</i> | PiericidinA2_AT_002.seq      | Q                                     | Q | G | H | S | Q | G | R | S | H | T | N | V | Methylmalonate           |                        |
| <i>S. piomogenus</i> var <i>hangzhouwanensis</i> | PiericidinA4_AT_001.seq      | Q                                     | Q | G | H | S | Q | G | R | S | H | T | N | V | Methylmalonate           |                        |
| <i>S. piomogenus</i> var <i>hangzhouwanensis</i> | PiericidinA6_AT_001.seq      | Q                                     | Q | G | H | S | Q | G | R | S | H | T | N | V | Methylmalonate           |                        |
| <i>S. piomogenus</i> var <i>hangzhouwanensis</i> | PiericidinA3_AT_001.seq      | S                                     | R | A | P | G | A | G | ~ | ~ | ~ | ~ | ~ | ~ | Malonate                 |                        |
| <i>S. piomogenus</i> var <i>hangzhouwanensis</i> | PiericidinA5_AT_001.seq      | Q                                     | Q | G | G | S | I | G | R | F | H | N | H | V | Malonate                 |                        |
| <i>S. piomogenus</i> var <i>hangzhouwanensis</i> | PiericidinA6_AT_002.seq      | Q                                     | Q | G | H | S | I | G | R | F | H | N | H | V | Malonate                 |                        |
| <i>Streptomyces noursei</i>                      | Nystatin_002_AT_001.seq      | Q                                     | Q | G | H | S | Q | G | R | S | H | T | N | V | Methylmalonate           |                        |
| <i>Streptomyces nodosum</i>                      | Amphotericin_004_AT_003.seq  | Q                                     | Q | G | H | S | Q | G | R | S | H | T | S | V | Methylmalonate           |                        |
| <i>Streptomyces caelestis</i>                    | Niddamycin_003_AT_001        | Q                                     | Q | G | H | S | Q | G | R | S | H | T | N | V | Methylmalonate           |                        |
| <i>Stigmatella aurantiaca</i>                    | Myxothiazol_001_AT_003.seq   | Q                                     | Q | G | S | S | I | G | R | S | H | T | N | V | Methylmalonate           |                        |
| <i>Streptomyces</i> sp. CK4412                   | Tautomycetin_001_AT_004.seq  | Q                                     | Q | G | H | S | Q | G | R | S | H | S | N | V | Methylmalonate           |                        |
| <i>Streptomyces platensis</i>                    | Pladienolide_003_AT_001.seq  | Q                                     | Q | G | H | S | Q | G | R | S | H | S | N | V | Methylmalonate           |                        |
| <i>Streptomyces natalensis</i>                   | Pimaricin_003_AT003.seq      | Q                                     | Q | G | H | S | Q | G | R | S | H | S | N | V | Methylmalonate           |                        |
| <i>Streptomyces halstedii</i>                    | Vicenistatin_004_AT_002.seq  | Q                                     | Q | G | H | S | V | G | R | F | H | N | H | V | Malonate                 |                        |
| <i>Streptomyces noursei</i>                      | Nystatin_004_AT_004.seq      | Q                                     | Q | G | H | S | V | G | R | F | H | N | H | V | Malonate                 |                        |
| <i>Streptomyces nanchangensis</i>                | Nanchangmycin_003_AT_001.seq | Q                                     | Q | G | H | S | V | G | R | F | H | N | H | V | Malonate                 |                        |
| <i>Streptomyces</i> sp. FR-008                   | FR008_005_AT_003.seq         | Q                                     | Q | G | H | S | V | G | R | F | H | N | H | V | Malonate                 |                        |
| <i>Streptomyces antibioticus</i>                 | Chlorothricin_006_AT_001.seq | Q                                     | Q | G | H | S | V | G | R | F | H | N | H | V | Malonate                 |                        |
| <i>Streptomyces nodosus</i>                      | Amphotericin_004_AT_004.seq  | Q                                     | Q | G | H | S | V | G | R | F | H | N | H | V | Malonate                 |                        |
| <i>Streptomyces hygroscopicus</i>                | Herbimycin_003_AT_001.seq    | Q                                     | Q | G | H | S | I | G | R | F | H | N | H | V | Malonate                 |                        |
| <i>Saccharopolyspora spinosa</i>                 | Spinosad_004_AT_002          | Q                                     | Q | G | H | S | V | G | R | F | H | T | Q | V | Malonate                 |                        |
| <i>Streptomyces hygroscopicus</i>                | Geldanamycin_003_AT_001.seq  | Q                                     | Q | G | H | S | I | G | R | F | H | N | H | V | Malonate                 |                        |

Shown are substrate-specifying motifs of the piericidin AT modules of *S. phillanthi*, *S. piomogenus*, and the most similar modules of other characterized polyketide synthases. Amino acid residues (given in the IUPAC one-letter abbreviation; ~ indicates amino acids not present in the corresponding AT domain) typical for different substrate-specifying motifs are colored based on described substrate specificity from several polyketide synthases (1) (for methylmalonate, green; for malonate, magenta). The detected substrate incorporation of methylmalonate vs. malonate on cocoons of *P. triangulum* is based on the metabolites detected in the HPLC-MS/MS data (N.d. refers to metabolites that could not be determined by applied methods). For the AT domains of piericidin modules A5 and A6, we could not determine if unspecific incorporation of malonyl-CoA (mal) or methylmalonyl-CoA (mmal) occurred, as our screening protocol did not include modifications of the pyridine ring.

1. Yadav G, Gokhale RS, Mohanty D (2003) Computational approach for prediction of domain organization and substrate specificity of modular polyketide synthases. *J Mol Biol* 328:335–363.



**Table S4. Sampling locations of beewolf specimens**

| Species                                  | Sampling location                                                                                                    |
|------------------------------------------|----------------------------------------------------------------------------------------------------------------------|
| <i>Philanthus quattuordecimpunctatus</i> | Horasan, Erzurum Province, Turkey                                                                                    |
| <i>Philanthus albopilosus</i>            | San Rafael Desert, Utah, United States                                                                               |
| <i>Philanthus barbiger</i>               | San Rafael Desert, Utah, United States                                                                               |
| <i>Philanthus bicinctus</i>              | Lake Creak, Wyoming, United States                                                                                   |
| <i>Philanthus bilunatus</i>              | Andover, New Hampshire, United States                                                                                |
| <i>Philanthus capensis</i>               | Riet River Mouth, Eastern Cape Province, and Simon's Town, Western Cape Province, South Africa                       |
| <i>Philanthus crabroniformis</i>         | Deadmens's Bar and Lake Creak, Wyoming, United States                                                                |
| <i>Philanthus fuscipennis</i>            | Patterson, Eastern Cape Province, South Africa                                                                       |
| <i>Philanthus gibbosus</i>               | Madison, Wisconsin, United States; Andover, New Hampshire, United States; and San Rafael Desert, Utah, United States |
| <i>Philanthus histrio</i>                | Franschhoek, Western Cape Province, South Africa                                                                     |
| <i>Philanthus loefflingi</i>             | Swellendam and Simon's Town, Western Cape Province, South Africa                                                     |
| <i>Philanthus multimaculatus</i>         | Sandy, Utah, United States                                                                                           |
| <i>Philanthus multimaculatus</i>         | San Rafael Desert, Utah, United States                                                                               |
| <i>Philanthus parkeri</i>                | San Rafael Desert, Utah, United States                                                                               |
| <i>Philanthus politus</i>                | Andover, New Hampshire, United States                                                                                |
| <i>Philanthus psyche</i>                 | San Rafael Desert, Utah, United States                                                                               |
| <i>Philanthus pulcher</i>                | Deadmens's Bar, Wyoming, United States                                                                               |
| <i>Philanthus rugosus</i>                | Riet River Mouth, Eastern Cape Province, South Africa                                                                |
| <i>Philanthus triangulum diadema</i>     | Patterson, Eastern Cape Province, and Simon's Town, Western Cape Province, South Africa                              |
| <i>Philanthus triangulum triangulum</i>  | Erzurum, Erzurum Province, Turkey                                                                                    |
| <i>Philanthus triangulum triangulum</i>  | Erlangen and Berlin, Germany                                                                                         |
| <i>Philanthus ventilabris</i>            | Sandy, Utah, United States                                                                                           |
| <i>Philanthus ventilabris</i>            | San Rafael Desert, Utah, United States                                                                               |
| <i>Philanthus venustus</i>               | Isparta, Isparta Province, Turkey                                                                                    |
| <i>Trachypus boharti</i>                 | Bauru and Ribeirão Preto, São Paulo Province, Brazil                                                                 |
| <i>Trachypus elongatus</i>               | São Simão and São Paulo, São Paulo Province, Brazil                                                                  |
| <i>Trachypus flavidus</i>                | Bauru and Ribeirão Preto, São Paulo Province, Brazil                                                                 |
| <i>Trachypus fulvipennis</i>             | Bauru and Ribeirão Preto, São Paulo Province, Brazil                                                                 |
| <i>Trachypus patagonensis</i>            | Ribeirão Preto, São Paulo Province, Brazil                                                                           |

**Fig. S1.** Predicted structures of beewolf symbiont-produced secondary metabolites described in Table S1 based on MS/MS fragmentation patterns. Proposed metabolite structures that also served as a basis for structure prediction by interpretation of fragmentation patterns are printed in red if confirmation is based on NMR and are italicized if confirmation is based on cojunction of synthetic standards (Fig. S2). Informative fragmentation sites are highlighted in the structures, and observed exact masses from the experimental data are indicated. Additional spectroscopic data would be needed for structural confirmation of predicted compounds.

[Fig. S1](#)

**Fig. S2.** Substance verification by synthetic standards. Ion traces ( $[M + H]^+$  adducts) of a representative extract of a beewolf antenna (*T. elongatus*; red) compared with pure synthetic standards (black) and coinjections (blue).

[Fig. S2](#)

**Fig. S3.** Clustering of beewolf antennal and cocoon extracts by geographic location. (A) DA highlighting beewolf species with both antennal and cocoon samples available. The DA is based on the 10 principal components extracted from the chemical composition of the symbiont-produced antibiotic mixture in antennal (circles) and cocoon extracts (triangles) based on the different beewolf species ( $n = 242$  extracts, Wilk's  $\Lambda = 7.6 \times 10^{-5}$ ,  $df = 270$ ,  $P < 0.001$ ). (B) DA based on the 10 principal components of the chemical composition of the symbiont-produced antibiotic mixture based on their geographic origin ( $n = 242$  extracts, Wilk's  $\Lambda = 0.049$ ,  $df = 20$ ,  $P < 0.001$ ).

[Fig. S3](#)

**Fig. S4.** Molecular basis of diversity in the synthesis of the piericidin derivatives in the beewolf symbiont-produced antibiotic mixture (piericidin A1 biosynthesis modified after refs. 1 and 2). (A) Structure and organization of the piericidin clusters of *S. piomogenus* var *hangzhouwanensis* and *S. philanthei* biovar *triangulum* and their similarity on the amino acid sequence level. (B) Tailoring steps of the immature polyketide after its release from the PKS enzyme complex are shown underneath the polyketide modules, and additional enzymatic modifications after the release from the polyketide synthase complex are also shown. Most of the variation in the antibiotic mixture of the beewolves arises from (i) different starting units, (ii) incorporation of different acyl-CoA (especially malonyl-CoA instead of methylmalonyl-CoA) units during elongation of the polyketide backbone, or skipped enzymatic steps as well as post-PKS modifications, like (iii) a missing reduction or later introduced oxidation of the polyketide side chain, (iv) ring formation without prior aminotransferase reaction, (v) modifications of hydroxyl groups, and (vi) additional introduction of hydroxyl groups or an epoxide function by oxygenases. Blue structural features indicate the changes introduced by the preceding enzymatic step. Magenta structural features indicate deviations from the major product of the polyketide cluster (piericidin A1). ACP, acyl carrier protein; AT, acyltransferase; DH, dehydratase; ER, enoylreductase; KR, ketoreductase; KS, ketosynthase; mal, malonyl-CoA; mmal, methylmalonyl-CoA; TE, thioesterase.

#### [Fig. S4](#)

1. Liu Q, et al. (2012) Elucidation of Piericidin A1 biosynthetic locus revealed a thioesterase-dependent mechanism of  $\alpha$ -pyridone ring formation. *Chem Biol* 19:243–253.
2. Ansari MZ, Yadav G, Gokhale RS, Mohanty D (2004) NRPS-PKS: A knowledge-based resource for analysis of NRPS/PKS megasynthases. *Nucleic Acids Res* 32:W405–W413.

**Fig. S5.** Annotation of piericidin biosynthesis genes and their products from the genome of *S. philanthei* biovar *triangulum* strain 23Af2 in comparison with *S. piomogenus* PKS cluster HQ840721 (schematic below). G, gap; I, identity; P, positive.

#### [Fig. S5](#)

### **Dataset S1. Observed retention times and fragmentation patterns of metabolites described in Table 1 on MS/MS high-energy collision dissociation fragmentation**

#### [Dataset S1](#)

Indicative fragments for molecule structures are printed in bold. Electron impact fragmentation patterns published by Yoshida et al. (1) of piericidin A1, B1, and C1 are highlighted in green if they also occurred after ESI ionization/HCD fragmentation, and they are highlighted in magenta if the fragments were absent.

1. Yoshida S, Yoneyama K, Shiraishi S, Watanabe A, Takahashi N (1977) Chemical structures of new piericidins produced by *Streptomyces pactum*. *Agric Biol Chem* 41:855–862.
